# Supplementary material
Source: PubMed Central journal article supplement (PMC2857045)
Supplement: supp_M109.085043_jbc.M109.085043-1.pdf [file supp_M109.085043_jbc.M109.085043-1.pdf]

**Supplemental Information***Primer pairs used for ChIP analysis using TaqMan approach*

The primers and probe used to analyze the 5' end of *STE11* were designed to amplify *STE11* between 397 bp and 492 bp downstream of the start codon and are the sequences are as follows:

*STE11* 5'\_F (+397 bp): 5' GTTAATGTAAATGGTTGCTTTAATGCAGATTCT 3'

*STE11* 5'\_R (+492 bp): 5' TTCTCCATTGGAGTTTGTGGCTAAT 3'

*STE11* 5'\_M (+449 bp — +464 bp): 5' TCATGTGGCAATCTTC 3'

The primers and probe used to analyze the 3' end of *STE11* were designed to amplify *STE11* between 1644 bp and 1748 bp downstream of the start codon and are the sequences are as follows:

*STE11* 3'\_F (+1644 bp): 5' CGGTCCATTTGAGGAATCACTGATTAC 3'

*STE11* 3'\_R (+1748 bp): 5' GCACCCTTGATATCTCTGTGAATAATGT 3'

*STE11* 3'\_M (+1690bp — +1705 bp): 5' ACGCAACCCCAATCAG 3'

The primers and probe used to analyze the 5' end of *Flo8* were designed to amplify *Flo8* between 437 bp and 540 bp downstream of the start codon and are the sequences are as follows:

*Flo8* 5'\_F (+437 bp): 5' GGGACATCTTTAATACCAGTTCTTCCA 3'

*Flo8* 5'\_R (+540 bp): 5' GCTTCTATATATTTGTTCCCTGCCTTTGTTTC 3'

*Flo8* 5'\_M (+474 bp — +489 bp): 5' TTGCTGAGCGAACTCT 3'

The primers and probe used to analyze the 3' end of *Flo8* were designed to amplify *Flo8* between 1899 bp and 1973 bp downstream of the start codon and are the sequences are as follows:

*Flo8* 3'\_F (+1899 bp): 5' CTCTAAAATAATCACTTCACAGAATAATACAGTATCCC 3'

*Flo8* 3'\_R (+1973 bp): 5' TGCGCCTCCAGTATGTTTCC 3'

*Flo8* 3'\_M (+1937bp — +1952 bp): 5' CCATTCGGCAATTCTT 3'

## Supplemental Tables

Table S1. Yeast Strains

| Yeast Strain | Genotype                                                                                                                                        | Source          |
|--------------|-------------------------------------------------------------------------------------------------------------------------------------------------|-----------------|
| WZY42        | <i>MATa; ura3-52; lys2-801; ade2-101; trp1Δ63; his3Δ200; leu2Δ1; hht1-hhf1::pWZ405-F2F9-LEU2; hht2-hhf2::pWZ403-F4F10-HIS3</i>                  | (1)             |
| SDBY1001     | as WZY42 with pJH18                                                                                                                             | (2)             |
| SDBY1005     | as WZY42 with pHCL55                                                                                                                            | (2)             |
| SDBY1155     | <i>MATa; ura3-52; lys2-801; ade2-101; trp1Δ63; his3Δ200; leu2Δ1; hht1-hhf1::pWZ405-F2F9-LEU2; hht2-hhf2::pWZ403-F4F10-HIS3; set2Δ::KanMX</i>    | This Study      |
| FY406        | <i>MATa; his3Δ200; trp1Δ63; lys2-128ξ; ura3-52; and leu2Δ1; (hta1-htb1)Δ::LEU2 (hta2-htb2)Δ::TRP1 &lt;pSAB6&gt;</i>                             | (3)             |
| SDBY1156     | as FY406 with pJH23                                                                                                                             | This Study      |
| SDBY1157     | as FY406 with pHND09                                                                                                                            | This Study      |
| SDBY1158     | as FY406 with pHND10                                                                                                                            | This Study      |
| SDBY1159     | as FY406 with pHND11                                                                                                                            | This Study      |
| SDBY1160     | as FY406 with pHND12                                                                                                                            | This Study      |
| SDBY1161     | as FY406 with pHND13                                                                                                                            | This Study      |
| SDBY1162     | as FY406 with pHND14                                                                                                                            | This Study      |
| SDBY1163     | as FY406 with pHND15                                                                                                                            | This Study      |
| SDBY1164     | as FY406 with pHND16                                                                                                                            | This Study      |
| SDBY1165     | as FY406 with pHND17                                                                                                                            | This Study      |
| SDBY1166     | as FY406 with pHND18                                                                                                                            | This Study      |
| SDBY1167     | as FY406 with pHND19                                                                                                                            | This Study      |
| JHY205       | <i>MATa; his3Δ1; leu2Δ0; met1Δ0; ura3Δ0; hht1-hhf1::KAN; hhf-2hht2::NAT; hta1-htb1::HPH; hta2-htb2::NAT pJH33[CEN URA3 HTA1-HTB1 HHT2-HHF2]</i> | (4)             |
| SDBY1168     | as JHY205 with pHND20 and pJH23                                                                                                                 | This Study      |
| SDBY1169     | as JHY205 with pHND21 and pJH23                                                                                                                 | This Study      |
| SDBY1170     | as JHY205 with pHND22 and pJH23                                                                                                                 | This Study      |
| SDBY1171     | as JHY205 with pHND20 and pHND16                                                                                                                | This Study      |
| SDBY1172     | as JHY205 with pHND20 and pHND19                                                                                                                | This Study      |
| SDBY1173     | as JHY205 with pHND22 and pHND16                                                                                                                | This Study      |
| SDBY1174     | as JHY205 with pHND22 and pHND19                                                                                                                | This Study      |
| BY4741       | <i>MATa; his3Δ1; leu2Δ0; met15Δ0; ura3Δ0</i>                                                                                                    | Open Biosystems |
| <i>set2Δ</i> | <i>MATa; his3Δ1; leu2Δ0; met15Δ0; ura3Δ0; set2Δ</i>                                                                                             | Open Biosystems |
| <i>ppr2Δ</i> | <i>MATa; his3Δ1; leu2Δ0; met15Δ0; ura3Δ0</i>                                                                                                    | Open Biosystems |
| SDBY1055     | as BY4741 <i>set2Δ</i> with pRS415                                                                                                              | (5)             |
| SDBY1056     | as BY4741 <i>set2Δ</i> with pRS415-Set2-HA 1-733                                                                                                | (5)             |
| SDBY1057     | as BY4741 <i>set2Δ</i> with pRS415-Set2-HA Δ11-15                                                                                               | (5)             |
| SDBY1058     | as BY4741 <i>set2Δ</i> with pRS415-Set2-HA Δ31-39                                                                                               | (5)             |
| SDBY1060     | as BY4741 <i>set2Δ</i> with pRS415-Set2-HA 1-618                                                                                                | (5)             |
| SDBY1175     | as BY4741 <i>set2Δ</i> with pHND23                                                                                                              | This Study      |
| SDBY1176     | as FY406 with pHND27                                                                                                                            | This Study      |
| SDBY1177     | as FY406 with pHND28                                                                                                                            | This Study      |
| SDBY1178     | as FY406 with pHND29                                                                                                                            | This Study      |
| SDBY1179     | as FY406 with pHND30                                                                                                                            | This Study      |
| SDBY1180     | as FY406 with pHND31                                                                                                                            | This Study      |
| SDBY1181     | as WZY42 with pHND32                                                                                                                            | This Study      |
| SDBY1182     | as WZY42 with pHND33                                                                                                                            | This Study      |
| SDBY1183     | as WZY42 with pHND34                                                                                                                            | This Study      |

**Table S1. Yeast Strains (continued)**

| Yeast Strain | Genotype             | Source     |
|--------------|----------------------|------------|
| SDBY1184     | as WZY42 with pHND35 | This Study |
| SDBY1185     | as WZY42 with pHND36 | This Study |
| SDBY1186     | as WZY42 with pHND37 | This Study |

**Table S2. Histone Plasmids**

| Plasmid | H3    | H4   | H2A                 | H2B  | Parent | Source     |
|---------|-------|------|---------------------|------|--------|------------|
| pJH18   | WT    | WT   | None                | None | pRS314 | (6)        |
| pHCL55  | K36R  | WT   | None                | None | pJH18  | (2)        |
| pHCL94  | WT    | K44Q | None                | None | pJH18  | (5)        |
| pJH23   | None  | None | WT                  | WT   | pRS313 | (3)        |
| pHND09  | None  | None | L116A               | WT   | pRS313 | This study |
| pHND10  | None  | None | L116I               | WT   | pRS313 | This study |
| pHND11  | None  | None | L116Q               | WT   | pRS313 | This study |
| pHND12  | None  | None | L117A               | WT   | pRS313 | This study |
| pHND13  | None  | None | L117Q               | WT   | pRS313 | This study |
| pHND14  | None  | None | K119Q, K120Q        | WT   | pRS313 | This study |
| pHND15  | None  | None | $\Delta$ L116, L117 | WT   | pRS313 | This study |
| pHND16  | None  | None | L116A, L117A        | WT   | pRS313 | This study |
| pHND17  | None  | None | L116E, L117E        | WT   | pRS313 | This study |
| pHND18  | None  | None | L116K, L117K        | WT   | pRS313 | This study |
| pHND19  | None  | None | L116Q, L117Q        | WT   | pRS313 | This study |
| pHND20  | WT    | WT   | None                | None | pRS415 | This study |
| pHND21  | K36R  | WT   | None                | None | pRS415 | This study |
| pHND22  | WT    | K44Q | None                | None | pRS415 | This study |
| pHND27  | None  | None | I112A               | WT   | pRS313 | This study |
| pHND28  | None  | None | H113A               | WT   | pRS313 | This study |
| pHND29  | None  | None | Q114A               | WT   | pRS313 | This study |
| pHND30  | None  | None | N115A               | WT   | pRS313 | This study |
| pHND31  | None  | None | P118A               | WT   | pRS313 | This study |
| pHND32  | R52A  | WT   | None                | None | pRS314 | This study |
| pHND33  | I112A | WT   | None                | None | pRS314 | This study |
| pHND34  | N108A | WT   | None                | None | pRS314 | This study |
| pHND35  | N108D | WT   | None                | None | pRS314 | This study |
| pHND36  | V117A | WT   | None                | None | pRS314 | This study |
| pHND37  | V117Q | WT   | None                | None | pRS314 | This study |

**Table S3. Other Plasmids**

| Plasmid | Inserted Gene       | Restriction sites in cloning | Promoter   | Vector  | Source     |
|---------|---------------------|------------------------------|------------|---------|------------|
| pHND23  | Set2-HA 1-261       | <i>Bam</i> HI, <i>Xho</i> I  | Endogenous | pRS415  | This Study |
| pHND24  | Set2                | <i>Nhe</i> I, <i>Kpn</i> I   | T7         | pCAL-n  | (5)        |
| pHND25  | Histone H4 24-50    | <i>Eco</i> RI, <i>Bam</i> HI | AmpR       | pGEX-2T | (5)        |
| pHND26  | Histone H2A 107-131 | <i>Bam</i> HI, <i>Xho</i> I  | AmpR       | pGEX-4T | This study |

**Table S4. Fold Change Analysis of *STE11* H3 K36 dimethylation ChIP Analysis (See Fig. 5A)**

| Samples Compared              | Location | Fold Change    |
|-------------------------------|----------|----------------|
| H3 K36R / WT                  | 5'       | -13.1 +/- 0.04 |
| H4 K44Q/ WT                   | 5'       | -1.6 +/- 0.05  |
| H2A L116A, L117A / WT         | 5'       | -2.1 +/- 0.06  |
| H4 K44Q+H2A L116A, L117A / WT | 5'       | -3.6 +/- 0.13  |
| H3 K36R / WT                  | 3'       | -15.3 +/- 0.05 |
| H4 K44Q/ WT                   | 3'       | -1.5 +/- 0.20  |
| H2A L116A, L117A / WT         | 3'       | -1.7 +/- 0.17  |
| H4 K44Q+H2A L116A, L117A / WT | 3'       | -3.7 +/- 0.14  |

\*Data represents three biological repeats with three technical repeats each.

**Table S5. Fold Change Analysis of *FLO8* H3 K36 dimethylation ChIP Analysis (See Fig. 5A)**

| Samples Compared              | Location | Fold Change    |
|-------------------------------|----------|----------------|
| H3 K36R / WT                  | 5'       | -12.0 +/- 0.04 |
| H4 K44Q/ WT                   | 5'       | -1.8 +/- 0.03  |
| H2A L116A, L117A / WT         | 5'       | -2.0 +/- 0.05  |
| H4 K44Q+H2A L116A, L117A / WT | 5'       | -2.9 +/- 0.04  |
| H3 K36R / WT                  | 3'       | -10.4 +/- 0.04 |
| H4 K44Q/ WT                   | 3'       | -1.8 +/- 0.17  |
| H2A L116A, L117A / WT         | 3'       | -1.9 +/- 0.14  |
| H4 K44Q+H2A L116A, L117A / WT | 3'       | -2.9 +/- 0.08  |

\*Data represents three biological repeats with three technical repeats each.

**Table S6. Fold Change Analysis of *STE11* H3 K36 trimethylation ChIP Analysis (See Fig. 5B)**

| Samples Compared              | Location | Fold Change    |
|-------------------------------|----------|----------------|
| H3 K36R / WT                  | 5'       | -8.1 +/- 0.06  |
| H4 K44Q/ WT                   | 5'       | -1.9 +/- 0.04  |
| H2A L116A, L117A / WT         | 5'       | -4.3 +/- 0.05  |
| H4 K44Q+H2A L116A, L117A / WT | 5'       | -9.6 +/- 0.03  |
| H3 K36R / WT                  | 3'       | -10.9 +/- 0.04 |
| H4 K44Q/ WT                   | 3'       | -2.0 +/- 0.11  |
| H2A L116A, L117A / WT         | 3'       | -4.2 +/- 0.11  |
| H4 K44Q+H2A L116A, L117A / WT | 3'       | -9.4 +/- 0.05  |

\*Data represents three biological repeats with three technical repeats each.

**Table S7. Fold Change Analysis of *FLO8* H3 K36 trimethylation ChIP Analysis (See Fig. 5B)**

| Samples Compared              | Location | Fold Change    |
|-------------------------------|----------|----------------|
| H3 K36R / WT                  | 5'       | -9.4 +/- 0.03  |
| H4 K44Q/ WT                   | 5'       | -1.9 +/- 0.05  |
| H2A L116A, L117A / WT         | 5'       | -4.2 +/- 0.02  |
| H4 K44Q+H2A L116A, L117A / WT | 5'       | -10.1 +/- 0.03 |
| H3 K36R / WT                  | 3'       | -12.9 +/- 0.04 |
| H4 K44Q/ WT                   | 3'       | -1.9 +/- 0.11  |
| H2A L116A, L117A / WT         | 3'       | -4.3 +/- 0.13  |
| H4 K44Q+H2A L116A, L117A / WT | 3'       | -11.9 +/- 0.02 |

\*Data represents three biological repeats with three technical repeats each.

**Table S8. Fold Change Analysis of *STE11* H4 acetylation ChIP Analysis (See Fig. 6A)**

| Samples Compared              | Location | Fold Change  |
|-------------------------------|----------|--------------|
| H3 K36R / WT                  | 5'       | 1.2 +/- 0.12 |
| H4 K44Q/ WT                   | 5'       | 1.8 +/- 0.15 |
| H2A L116A, L117A / WT         | 5'       | 1.8 +/- 0.27 |
| H4 K44Q+H2A L116A, L117A / WT | 5'       | 3.4 +/- 0.87 |
| H3 K36R / WT                  | 3'       | 2.1 +/- 0.42 |
| H4 K44Q/ WT                   | 3'       | 2.5 +/- 0.30 |
| H2A L116A, L117A / WT         | 3'       | 2.9 +/- 0.88 |
| H4 K44Q+H2A L116A, L117A / WT | 3'       | 5.3 +/- 0.54 |

\*Data represents three biological repeats with three technical repeats each.

**Table S9. Fold Change Analysis of *FLO8* H4 acetylation ChIP Analysis (See Fig. 6B)**

| Samples Compared              | Location | Fold Change  |
|-------------------------------|----------|--------------|
| H3 K36R / WT                  | 5'       | 1.0 +/- 0.11 |
| H4 K44Q/ WT                   | 5'       | 1.3 +/- 0.21 |
| H2A L116A, L117A / WT         | 5'       | 1.4 +/- 0.16 |
| H4 K44Q+H2A L116A, L117A / WT | 5'       | 2.6 +/- 0.11 |
| H3 K36R / WT                  | 3'       | 2.4 +/- 0.23 |
| H4 K44Q/ WT                   | 3'       | 2.6 +/- 0.16 |
| H2A L116A, L117A / WT         | 3'       | 3.6 +/- 0.49 |
| H4 K44Q+H2A L116A, L117A / WT | 3'       | 5.0 +/- 0.51 |

\*Data represents three biological repeats with three technical repeats each.

## REFERENCE

- Zhang, W., Bone, J. R., Edmondson, D. G., Turner, B. M., and Roth, S. Y. (1998) *EMBO J.* **17**, 3155-3167
- Fingerman, I. M., Li, H. C., and Briggs, S. D. (2007) *Genes Dev.* **21**, 2018-2029
- Hirschhorn, J. N., Bortvin, A. L., Ricupero-Hovasse, S. L., and Winston, F. (1995) *Mol. Cell Biol.* **15**, 1999-2009
- Ahn, S. H., Henderson, K. A., Keeney, S., and Allis, C. D. (2005) *Cell Cycle* **4**, 780-783
- Du, H. N., Fingerman, I. M., and Briggs, S. D. (2008) *Genes Dev.* **22**, 2786-2798
- Briggs, S. D., Bryk, M., Strahl, B. D., Cheung, W. L., Davie, J. K., Dent, S. Y., Winston, F., and Allis, C. D. (2001) *Genes Dev.* **15**, 3286-3295
